# Supplementary material for: Exposure to Dibutyl Phthalate and Reproductive-Related Outcomes in Animal Models: Evidence From Rodents Study
Source: Front Physiol. 2021 Dec 8;12:684532. doi: 10.3389/fphys.2021.684532 (PMC8692859; doi:10.3389/fphys.2021.684532)
Supplement: Supplementary file 1 [file Data_Sheet_1.xlsx]

## Sheet: Preface
Table of contents
Table S1:	Comprehensive search strategies for PubMed, EMBASE and Web of science
Table S2:	Risk of Bias and methodological quality of the included studies
Table S3:	Egger's regression test of each analysis.
Table S4:	Sensitivity analyses of the included studies
Figure S1:	Figure S1. Funnel plots of the analysis
Figure S2:	Figure S2. Forest plots of sperm count
Figure S3:	Figure S3. Forest plots of sperm motility
Figure S4:	Figure S4. Forest plots of sperm morphology
Figure S5:	Figure S5. Forest plots of testis weight
Figure S6:	Figure S6. Forest plots of seminal vesicles weight
Figure S7:	Figure S7. Forest plots of prostate weight
Figure S8:	Figure S8. Trim and filling method of sperm morphology

## Sheet: Table S1
Table S1. Comprehensive search strategies for PubMed, EMBASE and Web of science databases
Component	Search terms
PubMed
Component 1: dibutyl phthalate	(((((("Dibutyl Phthalate"[Mesh]) OR ((((((Phthalate, Dibutyl[Title/Abstract]) OR (Di-n-Butyl Phthalate[Title/Abstract])) OR (Di n Butyl Phthalate[Title/Abstract])) OR (Phthalate, Di-n-Butyl[Title/Abstract])) OR (Butyl Phthalate[Title/Abstract])) OR (Phthalate, Butyl[Title/Abstract]))OR (DBP[Title/Abstract])))
Component 2: genitalia	((((((((((((((((((Genitalia[MeSH]) OR (Genital Organ[Title/Abstract])) OR (Organ, Genital[Title/Abstract])) OR (Genital System[Title/Abstract])) OR (System, Genital[Title/Abstract])) ) OR (Genital[Title/Abstract])) OR (Reproductive Organs[Title/Abstract])) OR (Organ, Reproductive[Title/Abstract])) OR (Reproductive Organ[Title/Abstract])) OR (Reproductive System[Title/Abstract])) OR (System, Repro…
Component 3: rodentia	(((((((("rodentia" [MeSH] ) OR (Rodentias[Title/Abstract])) OR (Rodent[Title/Abstract])) OR (Capybara[Title/Abstract])) OR (Hydrochaeri[Title/Abstract])) OR (Jerboa[Title/Abstract])) OR (Dipodidae[Title/Abstract])) OR (Castor Beaver[Title/Abstract])) OR (Beaver[Title/Abstract])
Component 4: spermatozoa	"Spermatozoa"[Mesh] OR Spermatozoon[Title/Abstract] OR Sperm[Title/Abstract] OR X-Chromosome-Bearing Sperm[Title/Abstract] OR Sperm, X-Chromosome-Bearing[Title/Abstract] OR Sperms, X-Chromosome-Bearing[Title/Abstract] OR X Chromosome Bearing Sperm[Title/Abstract] OR X-Chromosome-Bearing Sperms[Title/Abstract] OR X-Bearing Sperm[Title/Abstract]) OR Sperm, X-Bearing[Title/Abstract] OR Sperms, X-Bea…
EMBASE
Component 1: dibutyl phthalate	‘phthalic acid dibutyl ester'/exp OR ‘phthalate, dibutyl':ab,ti OR ‘di-n-butyl phthalate':ab,ti OR‘di n butyl phthalate':ab,ti OR ‘phthalate, di-n-butyl':ab,ti OR ‘butyl phthalate':ab,ti OR‘phthalate, butyl':ab,ti OR‘DBP':ab,ti
Component 2: genitalia	genitalia'/exp OR 'genital organ':ab,ti OR 'organ, genital':ab,ti OR 'organ, genital':ab,ti OR 'system, genital':ab,ti OR 'genital':ab,ti OR 'reproductive organ':ab,ti OR 'organ, reproductive':ab,ti OR 'organ, reproductive':ab,ti OR 'reproductive organ':ab,ti OR 'reproductive system':ab,ti OR 'system, reproductive':ab,ti OR 'accessory sex organ':ab,ti OR 'organ, accessory sex':ab,ti OR 'sex organ…
Component 3: rodentia	rodentia'/exp OR 'rodentias':ab,ti OR 'rodent':ab,ti OR 'capybara':ab,ti OR 'hydrochaeri':ab,ti OR 'jerboa':ab,ti OR 'dipodidae':ab,ti OR 'castor beaver':ab,ti OR 'beaver':ab,ti
Component 4: spermatozoa	spermatozoa'/exp OR 'spermatozoon':ab,ti OR 'sperm':ab,ti OR 'x-chromosome-bearing sperm':ab,ti OR 'sperm, x-chromosome-bearing':ab,ti OR 'x chromosome bearing sperm':ab,ti OR 'x-bearing sperm':ab,ti OR 'sperm, x-bearing':ab,ti OR 'x bearing sperm':ab,ti OR 'y-chromosome-bearing sperm':ab,ti OR 'sperm, y-chromosome-bearing':ab,ti OR 'y chromosome bearing sperm':ab,ti OR 'y-bearing sperm':ab,ti OR…
Web of science
Component 1: dibutyl phthalate	TS=(Phthalate, Dibutyl OR Di-n-Butyl Phthalate OR Di n Butyl Phthalate OR Phthalate, Di-n-Butyl OR Butyl Phthalate OR Phthalate, Butyl OR DBP)
Component 2: genitalia	TS=(Genitalia OR Genital Organ OR Organ, Genital OR Genital System OR System, Genital OR Genital OR Reproductive Organ OR Organ, Reproductive OR Reproductive Organ OR Reproductive System OR System, Reproductive OR Accessory Sex Organ OR Organ, Accessory Sex OR Sex Organ, Accessory)
Component 3: rodentia	TS=(rodentia OR Rodentias OR Rodent OR Capybara OR Hydrochaeri OR Genital OR Jerboa OR Dipodidae OR Castor Beaver OR Beaver )
Component 4: spermatozoa	TS=(Spermatozoa OR Spermatozoon OR Sperm OR X-Chromosome-Bearing Sperm OR Sperm, X-Chromosome-Bearing OR X Chromosome Bearing Sperm OR X-Bearing Sperm OR Sperm, X-Bearing OR X Bearing Sperm OR Y-Chromosome-Bearing Sperm OR Sperm, Y-Chromosome-Bearing OR Y Chromosome Bearing Sperm OR Y-Bearing Sperm OR Sperm, Y-Bearing OR Y Bearing Sperm)

## Sheet: TableS2
Table S2. Risk of Bias and methodological quality of the included studies
Article
Author Ref	Q1	Q2	Q3	Q4	Q5	Q6	Q7	Q8	Q9	Q10
	Was the allocation sequence adequately generated and applied?	Were the groups similar at baseline or were they adjusted for confounders in the analysis?	Was the allocation to the different groups adequately concealed?	Were the animals randomly housed during the experiment?	Were the caregivers and/or investigators blinded from knowledge which intervention each animal received during the experiment?	Were animals selected at random for outcome assessment?	Was the outcome assessor blinded?	Were incomplete outcome data adequately addressed?	Are reports of the study free of selective outcome reporting?	Was the study apparently free of other problems that could result in high risk of bias?
NP 2019 et al.	Yes	Yes	?	?	?	?	?	?	?	?
Hongyan 2019 et al.	Yes	Yes	?	?	？	？	？	？	？	？
Amanda 2019 et al.	Yes	Yes	？	？	？	？	？	？	？	？
Ana 2018 et al	Yes	Yes	?	Yes	？	？	？	？	？	？
Matgorzata 2017 et al.	Yes	Yes	？	？	?	?	？	？	？	？
Giribabu1 2016 et al	Yes	Yes	?	?	？	？	？	？	？	？
Giribabu2 2016 et al	Yes	Yes	?	?	?	?	?	?	?	?
Hamdy 2015 et al	?	Yes	?	?	?	?	?	?	?	?
Neena 2014 et al	Yes	Yes	?	?	?	?	?	?	?	?
Rahish 2013 et al	Yes	Yes	?	?	?	?	?	?	?	?
Giribabu 2012 et al	Yes	Yes	?	Yes	?	?	?	?	?	?
Ai-Mei 2011 et al	Yes	Yes	?	?	?	?	Yes	?	?	?
Kim 2010 et al	Yes	Yes	?	?	？	？	？	？	？	？
Scarano 2010 et al	Yes	Yes	?	?	?	?	?	?	?	?
Anderson 2009 et al	Yes	Yes	?	?	？	？	？	？	？	？
Gary 2008 et al	?	Yes	?	?	?	?	?	?	?	?
Ebenezer 2007 et al	Yes	Yes	?	?	?	?	?	?	?	?
Tomoko 2004 et al	Yes	Yes	?	?	?	?	?	?	?	?
Zhang 2004 et al	Yes	Yes	?	Yes	?	?	?	?	?	?
	分配顺序是否充分生成和应用？
	两组在基线检查时是否相似，或者在分析中是否调整了混杂因素
	对不同群体的分配是否被充分隐藏？
	实验过程中这些动物是随机圈养的吗
	照料者和/或研究者是否对实验期间每只动物接受的干预措施一无所知
	随机选择动物进行结果评估
	结果评估员是瞎的吗
	不完整的结果数据是否得到充分处理
	研究报告是否没有选择性的结果报告
	这项研究是否明显没有其他可能导致高偏倚风险的问题

## Sheet: TableS3
Table S4. Egger's regression test of each analysis.
Author Ref
			Egger's regression test
Sperm count			＜0.001
Sperm motility			＜0.001
Sperm morphology			0.011
Testis weight			0.001
Seminal vesicle weight			0.011
Prostate weight			0.173

## Sheet: TableS4
Table S5. Sensitivity analyses of the included studies
Author Ref	Sperm count		Sperm morphology		Sperm motility		Testis weight		Seminal vesicle weight		Prostate weight
NP 2019et al.							√
Hongyan 2019 et al.	√		◎
Amanda 2019 et al.							√		√		√
Ana 2018 et al	√						√
Matgorzata 2017 et al.	√		√		√		√
Giribabu1 2016 et al			√
Giribabu2 2016 et al	√		◎		√		√		◎		√
Hamdy 2015 et al	√				√		√
Neena 2014 et al							√
Rahish 2013 et al	√		√		√		√		√
Giribabu 2012 et al	√				√		√		√		√
Ai-Mei 2011 et al							√
Scarano 2010 et al							√		√		√
Kim 2010 et al							√		√		√
Anderson 2009 et al							√		√		√
Gary 2008 et al							√
Ebenezer 2007 et al	√		√		√		◎		◎		√
Tomoko 2004 et al	√		√		√				√
Zhang 2004 et al	◎		√		◎						√
Note: √, be included in the analysis; ◎, be excluded due to sensitivity analysis

## Sheet: FigureS1
Figure S1. Funnel plots of the analysis
		Notes: A, Funnel plot of sperm count; B, Funnel plot of sperm motility; C, Funnel plot of sperm morphology; D, Funnel plot of testis weight; E, Funnel plot of seminal vesicle weight; F, Funnel plot of prostate weight

## Sheet: Figure S2
Figure S2. Forest plots of sperm count
		Notes: A, Forest plot of sperm count (exposure days); B, Forest plot of sperm count (dose); C, Forest plot of sperm count (exposure period)

## Sheet: Figure S3
Figure S3. Forest plots of sperm motility
				Notes: A, Forest plot of sperm motility (exposure days); B, Forest plot of sperm motility (dose); C, Forest plot of sperm motility (exposure period)

## Sheet: Figure S4
Figure S4. Forest plots of sperm abnormalities
			Notes: A, Forest plot of sperm morphology (exposure days); B, Forest plot of sperm morphology (dose); C, Forest plot of sperm morphology (exposure period)

## Sheet: Figure S5
Figure S5. Forest plots of testis weight
		Notes: A, Forest plot of testis weight (exposure days); B, Forest plot of testis weight (dose); C, Forest plot of testis weight (exposure period)

[truncated: 3 more sheets: Figure S6, Figure S7, Figure S8]
